# Supplementary material for: Lithium and Potassium Cations Affect the Performance of Maleamate-Based Organic Anode Materials for Potassium- and Lithium-Ion Batteries
Source: MDPI journal article supplement (doi:10.3390/nano11113120), 2021-11-19
Supplement: s1 [file s1]

# Lithium and Potassium Cations Affect the Performance of Maleamate-Based Organic Anode Materials for Potassium- and Lithium-Ion Batteries

Kefyalew Wagari Guji <sup>1,2</sup>, Wen-Chen Chien <sup>2,3,\*</sup>, Fu-Ming Wang <sup>1,4,5,6,\*</sup>, Alagar Ramar <sup>1</sup>, Endazenaw Bizuneh Chemere <sup>1,2</sup>, Lester Tiong <sup>1</sup> and Laurien Merinda <sup>1</sup>

<sup>1</sup> Graduate Institute of Applied Science and Technology, National Taiwan University of Science and Technology, Taipei 106, Taiwan; gujikefyalew@gmail.com (K.W.G.); chemramar@gmail.com (A.R.); endazenaw27@gmail.com (E.B.C.); ltpw93@hotmail.com (L.T.); merinda795@gmail.com (L.M.)

<sup>2</sup> Battery Research Center of Green Energy, Ming Chi University of Technology, New Taipei City 243, Taiwan

<sup>3</sup> Department of Chemical Engineering, Ming Chi University of Technology, New Taipei City 243, Taiwan

<sup>4</sup> Sustainable Energy Center, National Taiwan University of Science and Technology, Taipei 106, Taiwan

<sup>5</sup> Department of Chemical Engineering, Chung Yuan Christian University, Taoyuan 320314, Taiwan

<sup>6</sup> R&D Center for Membrane Technology, Chung Yuan Christian University, Taoyuan 32023, Taiwan

\* Correspondence: wcchien@mail.mcut.edu.tw (W.-C.C.); mccabe@mail.ntust.edu.tw (F.-M.W.); Tel.: +886-2-2908-9899 (ext. 4628) (W.-C. C.); +886-2-2730-3755 (F.-M. W.); Fax: +886-2-2908-3072 (W.-C. C.); +886-2-2737-6922 (F.-M. W.)

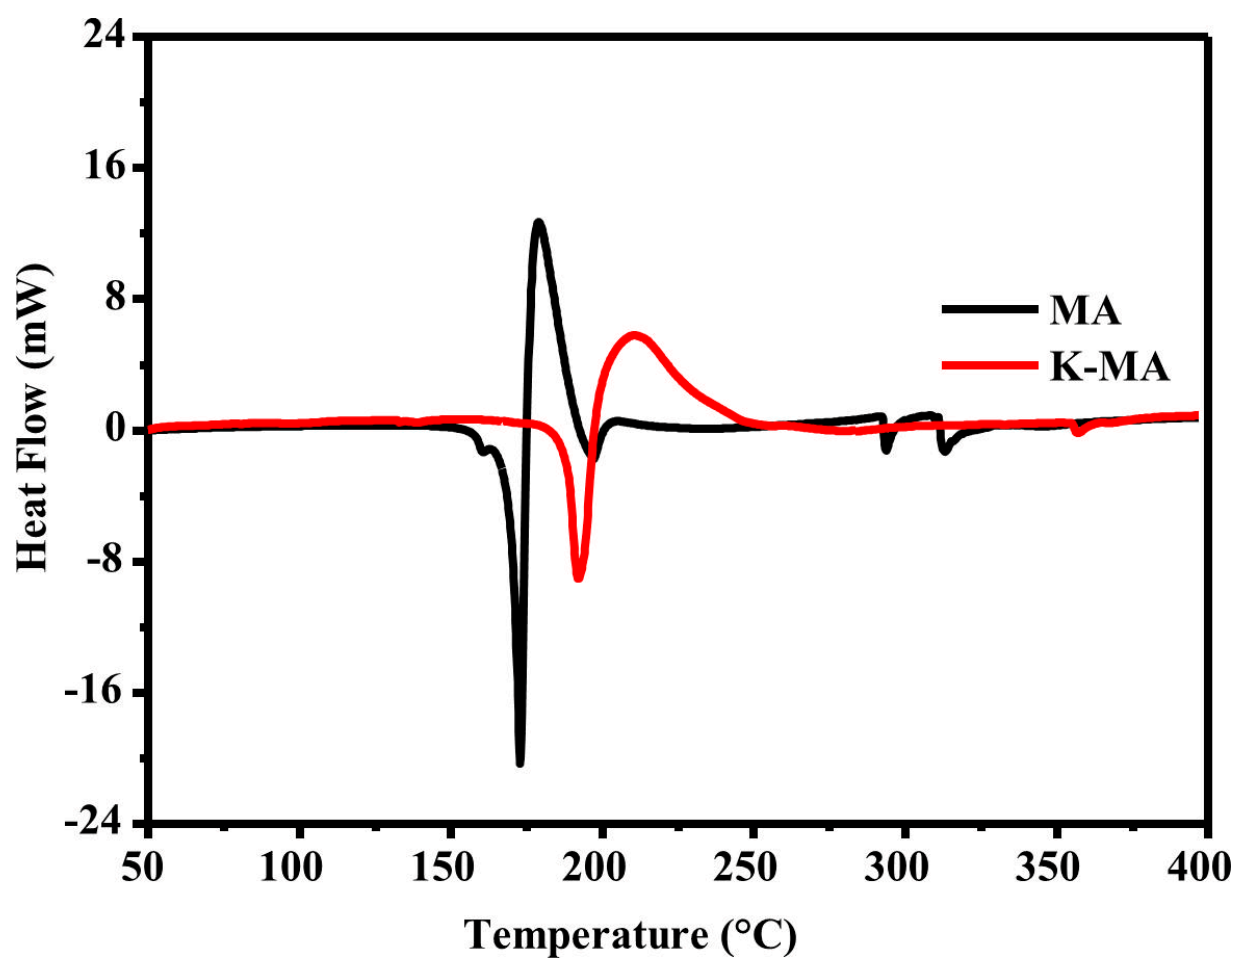

**Figure S1.** DSC traces of MA and K-MA, recorded at a scan rate of 10 °C min<sup>-1</sup>.

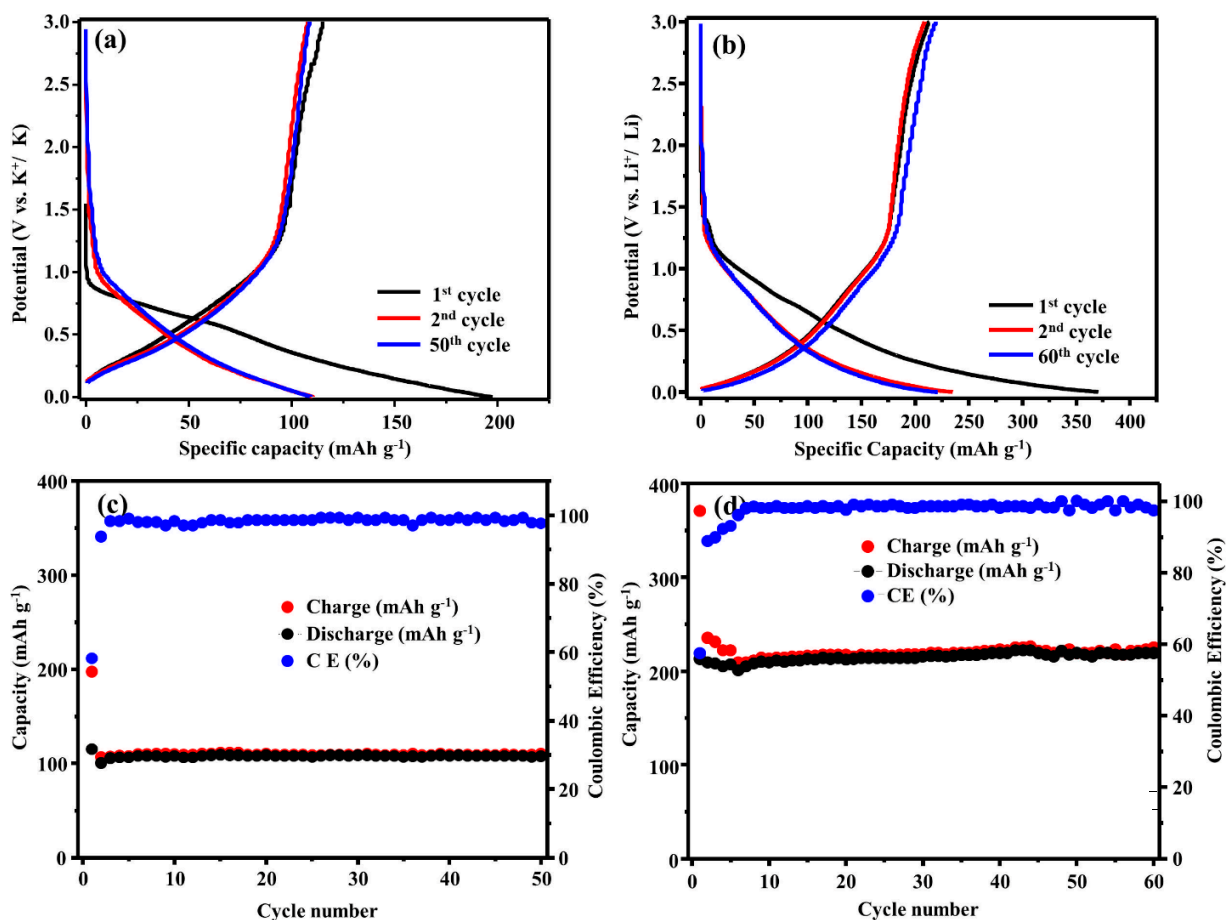

**Figure S2.** (a, b) Charge/discharge profiles and (c, d) cyclic performance of (a, c) SP\_KFSI (100%) as KIBs and (b, d) SP\_LiFSI (100%) as LIBs, measured at a scan rate of 0.1 mV s<sup>-1</sup> and a rate of 0.1C.

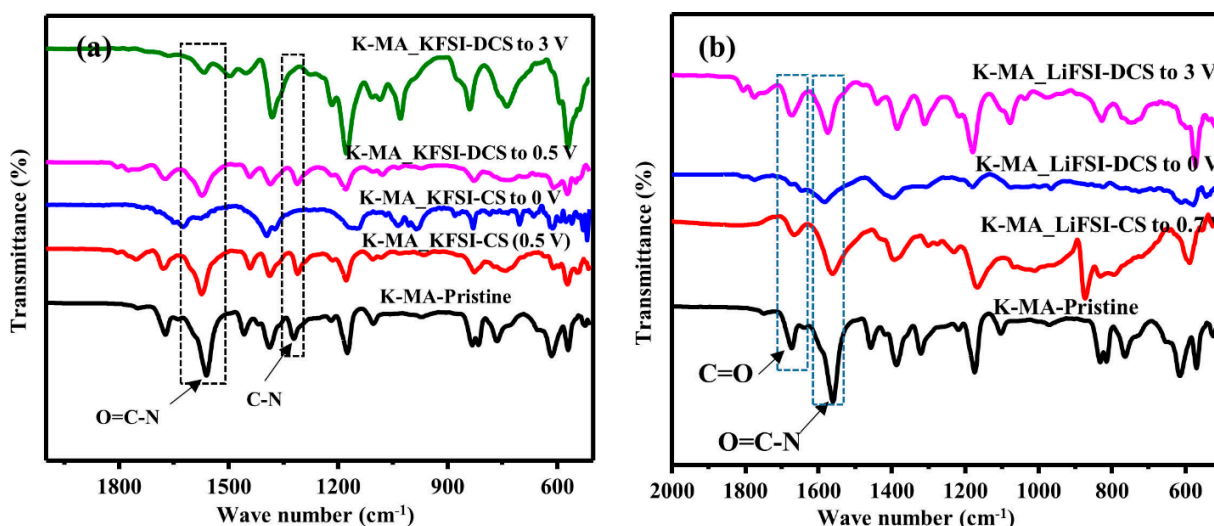

**Figure S3.** Ex-situ FTIR spectra of (a) K-MA\_KFSI and (b) K-MA\_LiFSI electrodes in pristine, charging state (CS), and discharging states (DCS).

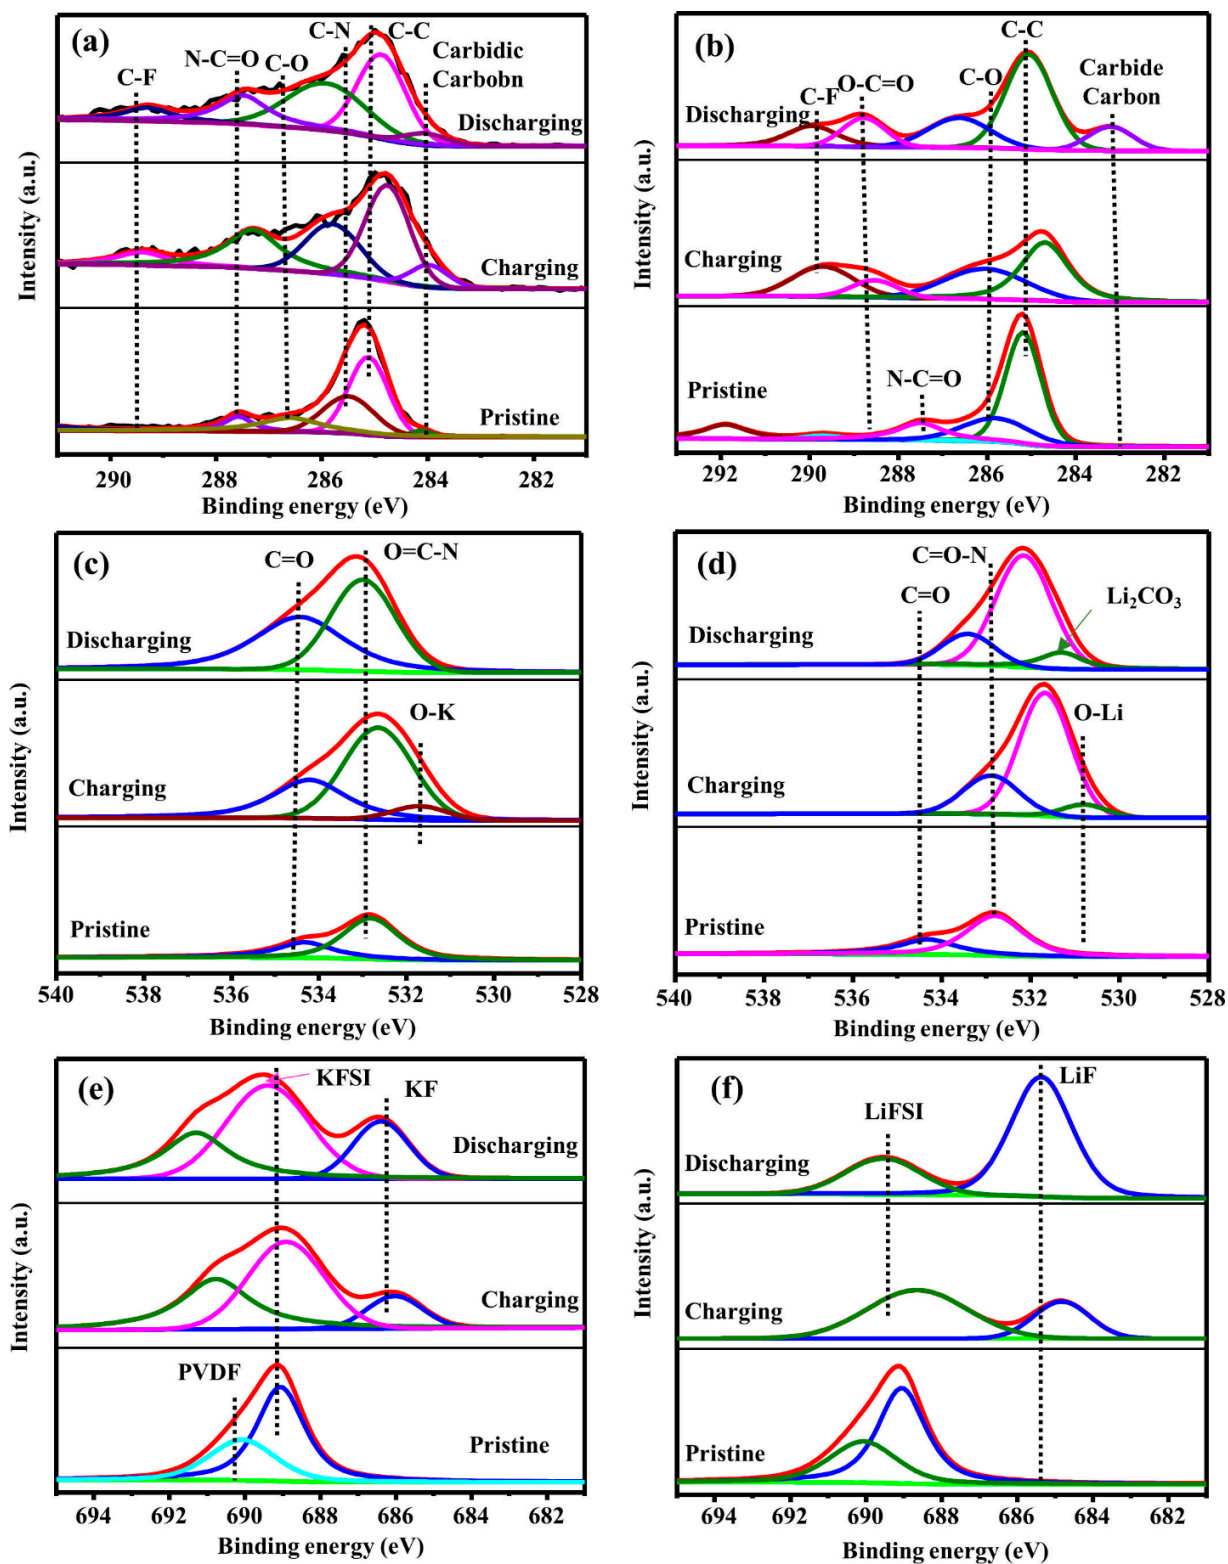

**Figure S4.** (a, b) C 1s, (c, d) O 1s, and (e, f) F 1s XPS spectra of (a, c, e) K-MA\_KFSI and (b, d, f) K-MA\_LiFSI electrodes in pristine, charging, and discharging states.

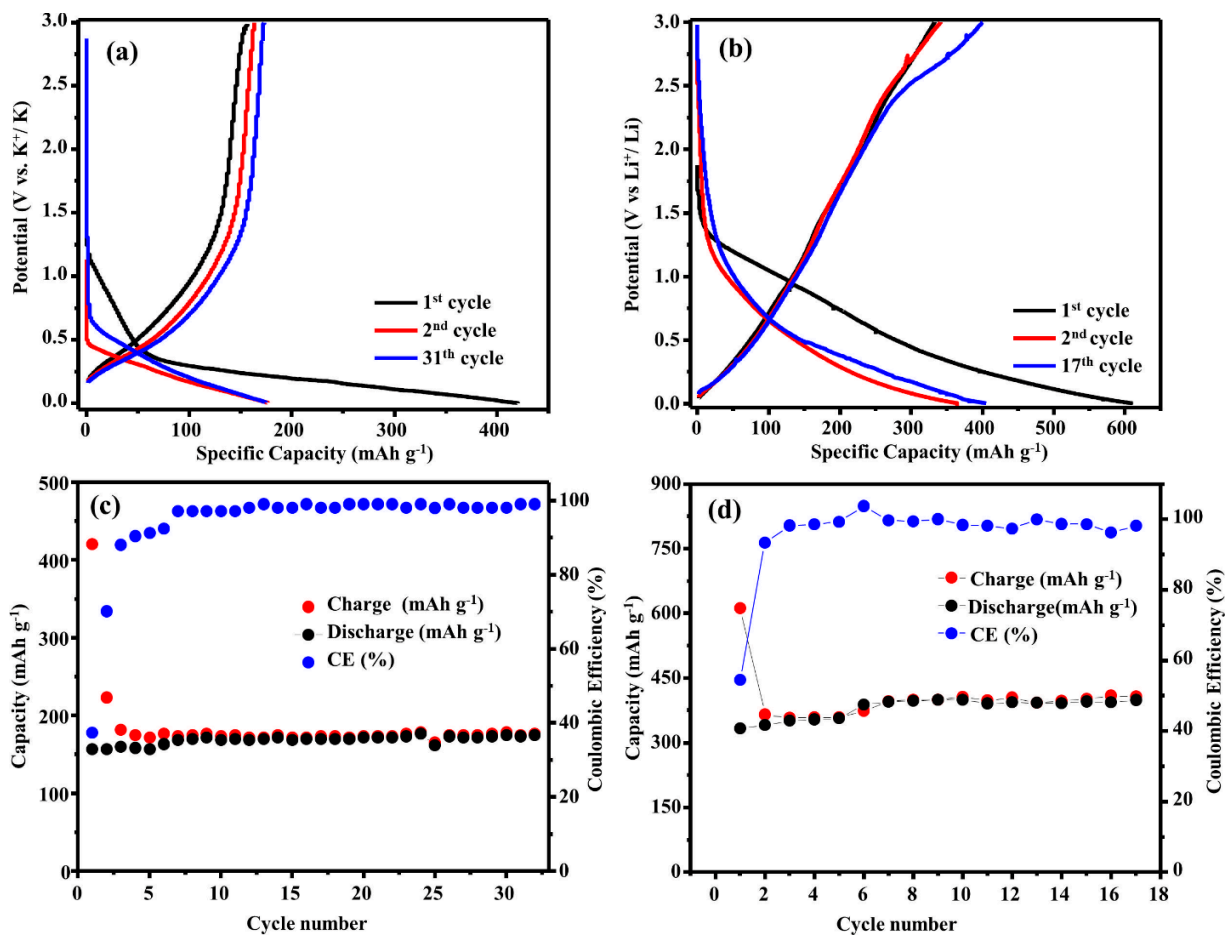

**Figure S5.** (a, b) Charge/discharge profiles and (c, d) cyclic performance of (a, c) Li-MA\_KFSI and (b, d) Li-MA\_LiFSI at a rate of 0.1C.

**Table S1.** Li<sup>+</sup> ion conductivities in 1 M LiPF<sub>6</sub> and 1 M LiFSI and K<sup>+</sup> ion conductivity in 1 M KFSI, measured through conductometry.

| Electrolyte                                   | Ionic conductivity<br>(mS cm <sup>-1</sup> ) | Temperature<br>(°C) |
|-----------------------------------------------|----------------------------------------------|---------------------|
| 1M LiPF <sub>6</sub> [EC:PC:DEC, 3:2:5 (v/v)] | 3.88                                         | 24.7                |
| 1M LiFSI [EC:EMC, 1:2 (v/v)]                  | 3.65                                         | 25.5                |
| 1M KFSI [EC:EMC, 1:2 (v/v)]                   | 8.47                                         | 25.2                |

**Table S2.** Capacities of K-MA\_LiFSI, K-MA\_KFSI, SP\_LiFSI, and SP\_KFSI measured at current densities of 5C and 10C.

| <b>Sample</b> | <b>5C (mA h g<sup>-1</sup>)</b> | <b>10C (mA h g<sup>-1</sup>)</b> | <b>Difference (mA h g<sup>-1</sup>)</b> |
|---------------|---------------------------------|----------------------------------|-----------------------------------------|
| K-MA_LiFSI    | 166.7                           | 150.0                            | -5.67 (-8.57%)                          |
| K-MA_KFSI     | 108.6                           | 88.9                             | -8.8 (-15%)                             |
| SP_LiFSI      | 125.4                           | 109.3                            | -14.49 (-12.84%)                        |
| SP_KFSI       | 24.3                            | 13.1                             | -10.08 (-46.1%)                         |
